# Supplementary material for: Evaluation of the Health-Promoting Properties of Selected Fruits
Source: MDPI journal article supplement (doi:10.3390/molecules26144202), 2021-07-10

## Supplementary Material

**Table S1.** The influence of the extraction conditions on the antioxidants assays (TAC, TPC and TFC) for each fruit extract (pitanga, tangerine, tomato, uva-da-serra and lemon). Data results were normalized by Log<sub>10</sub> application.

| Antioxidant Assay | Extraction Solvent | Pitanga | Tangerine | Tomato | Uva-da-Serra | Lemon |
|-------------------|--------------------|---------|-----------|--------|--------------|-------|
| <b>DPPH</b>       | ACN:MeOH           | 2.1     | 0.51      | 0.78   | 1.2          | 0.85  |
|                   | ACN:EtAc           | 0.29    | 0.35      | 0.19   | 0.81         | 0.90  |
|                   | MeOH:FA 0.1        | 2.3     | 1.1       | 0.82   | 1.3          | 1.2   |
|                   | MeOH               | 0.17    | 0.50      | 0.37   | 0.75         | 0.88  |
|                   | ACN                | 2.2     | 0.96      | 0.82   | 1.32         | 1.0   |
|                   | EtAc               | 0.13    | 0.72      | 0.40   | 0.79         | 0.96  |
|                   | FA 0.1%            | 2.0     | 1.1       | 0.69   | 1.59         | 1.0   |
| <b>TPC</b>        | ACN:MeOH           | 5.5     | 5.2       | 4.6    | 5.4          | 5.2   |
|                   | ACN:EtAc           | 4.5     | 4.7       | 4.5    | 4.7          | 4.7   |
|                   | MeOH:FA 0.1        | 5.7     | 5.4       | 4.7    | 5.6          | 5.5   |
|                   | MeOH               | 4.4     | 4.9       | 4.44   | 4.9          | 4.7   |
|                   | ACN                | 5.6     | 5.3       | 4.7    | 5.7          | 5.5   |
|                   | EtAc               | 4.5     | 4.6       | 4.6    | 4.7          | 4.7   |
|                   | FA 0.1%            | 5.7     | 5.1       | 4.9    | 5.5          | 5.8   |
| <b>TFC</b>        | ACN:MeOH           | 4.7     | 3.8       | 3.3    | 5.1          | 4.3   |
|                   | ACN:EtAc           | 3.9     | 4.0       | 4.2    | 5.0          | 4.1   |
|                   | MeOH:FA 0.1        | 5.0     | 4.4       | 4.1    | 5.3          | 4.7   |
|                   | MeOH               | 2.9     | 3.5       | 2.8    | 4.6          | 3.8   |
|                   | ACN                | 5.0     | 4.9       | 4.8    | 5.4          | 4.9   |

|             |             |     |     |     |     |     |
|-------------|-------------|-----|-----|-----|-----|-----|
|             | EtAc        | 5.5 | 4.5 | 4.3 | 5.1 | 5.0 |
|             | FA 0.1%     | 5.4 | 5.8 | 6.0 | 5.8 | 5.5 |
| <b>ABTS</b> | ACN:MeOH    | 4.3 | 3.9 | 3.1 | 4.3 | 3.9 |
|             | ACN:EtAc    | -   | -   | -   | -   | -   |
|             | MeOH:FA 0.1 | 4.3 | 4.2 | 3.7 | 4.3 | 4.3 |
|             | MeOH        | -   | -   | -   | -   | -   |
|             | ACN         | 4.3 | 3.9 | 2.9 | 4.3 | 4.2 |
|             | EtAc        | -   | -   | -   | -   | -   |
|             | FA 0.1%     | 4.2 | 3.8 | -   | -   | -   |

**Solvent extraction conditions:** methanol - MeOH, acetonitrile – ACN, ethyl acetate - EtAc, formic acid 0.1 % - FA, ACN:MeOH (4:1, v/v), ACN:EtAc (1:1, v/v) and MeOH:FA (19:1, v/v).

**Table S2.** Literature survey of Total phenolic content (TPC), total flavonoid content (TFC), total antioxidant capacity (DPPH and ABTS assays) and inhibition of selected enzymes ( $\alpha$ -amylase,  $\alpha$ - and  $\beta$ -glucosidase, and angiotensin-converting enzyme (ACE), reported for pitanga, tangerine, lemon, tomato and uva-da-serra extracts.

| Extracts conditions                                                  | TPC                             | TFC                          | DPPH                                            | ABTS                           | $\alpha$ -amylase <sup>1</sup> | $\alpha$ -glucosidase <sup>1</sup>                                          | $\beta$ -glucosidase <sup>1</sup> | ACE <sup>1</sup> | Ref       |
|----------------------------------------------------------------------|---------------------------------|------------------------------|-------------------------------------------------|--------------------------------|--------------------------------|-----------------------------------------------------------------------------|-----------------------------------|------------------|-----------|
| <b>Pitanga</b>                                                       |                                 |                              |                                                 |                                |                                |                                                                             |                                   |                  |           |
| Seeds / pulp                                                         | 32373 / 15707 mg GAE / 100 g DW | 6112 / 5912 mg QE / 100 g DW | 17845 / 11883 mM TE / 100 g DW                  | 89907 / 56066 mM TE / 100 g DW | 56 / 37                        | 103 / 60                                                                    | 62 / 59                           | 95               | This work |
| oils from leaves                                                     |                                 |                              | 15350 - 40030 mg TE / 100 g                     |                                |                                |                                                                             |                                   |                  | 1         |
| supercritical extract of seeds                                       | 0.003-7.3 mg GAE / 100 g        |                              | (IC <sub>50</sub> ) - 460.1 - 5024.6 mg / 100 g | 532-3337 $\mu$ M TE / 100 g    |                                |                                                                             |                                   |                  | 2         |
| pressurized fluid extraction of seeds (dried-12.7% H <sub>2</sub> O) | 420-1680 mg GAE / 100 g DW      |                              |                                                 |                                |                                |                                                                             |                                   |                  | 3         |
| pulp homogenized in ethanolic solution                               | 663.8 mg CAE / 100 g            |                              | IC <sub>50</sub> - 15.45 $\mu$ g / mL           |                                |                                | IC <sub>50</sub> - Acarbose 413.6 $\mu$ g / mL, extract 0.26 $\mu$ L / mL   |                                   |                  | 4         |
|                                                                      | 517-908 mg CAE / 100 g FW       |                              | IC <sub>50</sub> - 212 - 317 $\mu$ g / mL       |                                |                                | IC <sub>50</sub> - Acarbose 413.6 $\mu$ g / mL, extract 66-212 $\mu$ g / mL |                                   |                  | 5         |
|                                                                      | 226.88 mg CAE / 100 mL          |                              | 85.9 % DPPH inhibition                          |                                |                                | 74.2                                                                        |                                   |                  | 6         |
| juice                                                                | 36.7 mg GAE / 100 mL            |                              |                                                 |                                |                                | 69.47 % inhibition with 5 mg / mL                                           |                                   |                  | 7         |

|                                                  |                                               |                                             |                                             |                                               |                                                        |                                                         |         |      |              |
|--------------------------------------------------|-----------------------------------------------|---------------------------------------------|---------------------------------------------|-----------------------------------------------|--------------------------------------------------------|---------------------------------------------------------|---------|------|--------------|
| pulp<br>homogenized in<br>methanolic<br>solution | 4253 mg CAE /<br>100 g                        |                                             | 20668 mM TE /<br>100 g                      |                                               | IC <sub>50</sub> - 5.7 mg /<br>mL reaction<br>solution | IC <sub>50</sub> - 1.15 mg /<br>mL reaction<br>solution |         |      | 8            |
| leaves                                           | 19306 mg GAE /<br>100 g                       | 2864 mg GAE /<br>100 g                      |                                             |                                               |                                                        |                                                         |         |      | 9            |
| <b>Tangerine</b>                                 |                                               |                                             |                                             |                                               |                                                        |                                                         |         |      |              |
| Peel / juice <sup>2</sup>                        | 18692 / 216 <sup>2</sup> mg<br>GAE / 100 g DW | 2559 / 202 <sup>2</sup> mg<br>QE / 100 g DW | 4408 / 457 <sup>2</sup> mM TE<br>/ 100 g DW | 37126 / 1905 <sup>2</sup> mM<br>TE / 100 g DW | 54 / 56                                                | 31 / 25                                                 | 56 / 60 | 96   | This<br>work |
| oil                                              |                                               |                                             |                                             |                                               |                                                        |                                                         |         | 59.2 | 10           |
| oil                                              |                                               |                                             | 750-2000 mg TE /<br>100 mL                  | 1550-3000 mg TE /<br>100 mL                   |                                                        |                                                         |         |      | 11           |
| juices                                           |                                               |                                             | 24-68 % DPPH<br>inhibition                  |                                               |                                                        |                                                         |         |      | 12           |
| juices                                           | 92 mg GAE / 100<br>mL                         | 11 mg GAE / 100<br>mL                       | 64.53 % DPPH<br>inhibition                  | 0.98 % ABTS<br>inhibition                     |                                                        | IC <sub>50</sub> - 12 mg /<br>mL                        |         |      | 13           |
| freeze dried                                     |                                               |                                             | 2.50 mM TE / 100g<br>DW                     | 6.47 mM TE / 100<br>g DW                      |                                                        |                                                         |         |      | 14           |
| <b>Lemon</b>                                     |                                               |                                             |                                             |                                               |                                                        |                                                         |         |      |              |
| Peel / juice <sup>2</sup>                        | 17067 / 175 <sup>2</sup> mg<br>GAE / 100 g DW | 3715 / 256 <sup>2</sup> mg<br>QE / 100 g DW | 9592 / 294 <sup>2</sup> mM TE<br>/ 100 g DW | 32081 / 1033 <sup>2</sup> mM<br>TE / 100 g DW | 23 / 78                                                | 46 / 48                                                 | 15 / 77 | 96   | This<br>work |
| -                                                | 4750 mg / 100 g                               |                                             | 94.4% DPPH<br>inhibition                    |                                               | 87.3                                                   |                                                         |         |      | 15           |
| oil                                              |                                               |                                             |                                             |                                               |                                                        |                                                         |         | 24.8 | 10           |
| lyophilized juice                                |                                               |                                             |                                             |                                               |                                                        |                                                         |         | 18   | 16           |
| oil                                              |                                               |                                             | 2000-2750 mg TE /<br>100 mL                 | 600-1500 mg TE /<br>100 mL                    |                                                        |                                                         |         |      | 11           |

|                                         |                          |                       |                               |                        |                                                                     |                                                                      |    |                                 |           |
|-----------------------------------------|--------------------------|-----------------------|-------------------------------|------------------------|---------------------------------------------------------------------|----------------------------------------------------------------------|----|---------------------------------|-----------|
| oil                                     | 1951-3197 mg GAE / 100 g | 229-414 mg QE / 100g  | 49.29-52.32 % DPPH inhibition |                        | 26                                                                  | 36                                                                   |    |                                 | 17        |
| Peels hydrolysis                        | 488 mg GAE / 100 g DW    |                       |                               |                        | -11.6                                                               | 100                                                                  |    | 100                             | 18        |
| oil                                     |                          |                       |                               |                        | IC <sub>50</sub> - Acarbose<br>7.45 µg / mL<br>extract 8.16 µg / mL | IC <sub>50</sub> - Acarbose<br>8.44 µg / mL,<br>extract 7.56 µg / mL |    | IC <sub>50</sub> - 6.17 µg / mL | 19        |
| juices                                  |                          |                       | 24-5-42.0 % DPPH inhibition   |                        |                                                                     |                                                                      |    |                                 | 12        |
| young lemon shoots                      | 8930 mg GAE / 100 g DW   |                       |                               |                        |                                                                     |                                                                      |    |                                 | 20        |
| juices                                  | 103 mg GAE / 100 mL      | 14 mg GAE / 100 mL    | 42.28 % DPPH inhibition       | 0.72 % ABTS inhibition |                                                                     |                                                                      |    |                                 | 13        |
| juices                                  | 222-236 mg GAE / 100 g   | 170-189 mg QE / 100 g | 1558-1761 mM TE / 100 g       |                        |                                                                     |                                                                      |    |                                 | 21        |
| <b>Tomato</b>                           |                          |                       |                               |                        |                                                                     |                                                                      |    |                                 |           |
| <i>gordal</i> variety whole fruit       | 5632 mg GAE / 100 g DW   | 2152 mg QE / 100 g DW | 8217 mM TE / 100 g DW         | 6389 mM TE / 100 g DW  | 34                                                                  | 52                                                                   | 63 | 97                              | This work |
| pulp homogenized in methanolic solution | 48 mg GAE / 100 g        |                       |                               |                        |                                                                     |                                                                      |    |                                 | 22        |
| lyophilized samples                     | 2080-3360 mg GAE / 100 g |                       |                               |                        |                                                                     |                                                                      |    |                                 | 23        |
| locular gel and the serum               | 50-110 mg GAE / 100 g    |                       | 210-380 mM TE / 100 g         | 350-700 mM TE / 100 g  |                                                                     |                                                                      |    |                                 | 24        |
| QuEChERS                                | 52 mg GAE / 100 g        | 24 mg QE / 100 g      | 98 mM TE / 100 g              | 114 mM TE / 100 g      |                                                                     |                                                                      |    |                                 | 25        |

|                                                   |                             |                          |                                    |                                    |                                 |                                         |      |                                     |           |
|---------------------------------------------------|-----------------------------|--------------------------|------------------------------------|------------------------------------|---------------------------------|-----------------------------------------|------|-------------------------------------|-----------|
| lyophilized samples                               |                             |                          |                                    |                                    |                                 |                                         |      | IC <sub>50</sub> - 8.5-57.4 mg / mL | 26        |
| Peels hydrolysis                                  | 365 mg GAE / 100 g          |                          |                                    |                                    | -37.7                           |                                         | 42.5 | 100                                 | 18        |
| juice                                             | 192 mg GAE / 100 g          |                          |                                    |                                    |                                 |                                         | 72   |                                     | 27        |
| lyophilized samples                               | 784-1315 mg GAE / 100 g     |                          |                                    | IC <sub>50</sub> - 146-175 µg / mL |                                 |                                         |      |                                     | 28        |
| freeze-dried frozen puree                         |                             |                          |                                    | 664-1472 mM TE / 100 g             | 674-1650 mM TE / 100 g          |                                         |      |                                     | 29        |
| freeze-dried frozen puree                         |                             |                          |                                    |                                    |                                 |                                         |      | 30-40                               | 30        |
| <b>Uva-da-serra</b>                               |                             |                          |                                    |                                    |                                 |                                         |      |                                     |           |
| Uva-da-serra whole fruit                          | 24158 mg GAE / 100 g DW     | 13604 mg QE / 100 g DW   | 19150 mM TE / 100 g DW             | 85561 mM TE / 100 g DW             | 22                              | 51                                      | 67   | 86                                  | This work |
| myrtle oil                                        |                             |                          |                                    |                                    |                                 |                                         |      | 93.6                                | 10        |
| blueberry juice                                   | 128 mg GAE / 100 mL         |                          |                                    | 63 mM TE / 100 mL                  | IC <sub>50</sub> - 2.67 mg / mL | IC <sub>50</sub> - 40.68 mg / mL        |      |                                     | 31        |
|                                                   | 7.5-24.5 mg GAE / 100 mL    | 0.2-12.6 mg QE / 100 mL  |                                    |                                    |                                 |                                         |      |                                     | 32        |
| blueberry pulp homogenized in methanolic solution | 185.6-929 mg GAE / 100 mL   | 39.5-64.6 mg QE / 100 mL |                                    |                                    |                                 |                                         |      |                                     | 33        |
| blueberry air dried, in ethanol,                  | 1642-4442 mg GAE / 100 g DW | 140-922 mg QE / 100 g DW | IC <sub>50</sub> - 141-263 µg / mL |                                    |                                 | IC <sub>50</sub> - Acarbose 31 µg / mL, |      |                                     | 34        |

|                                      |                              |                          |                            |                                                                       |                                                                         |                                    |
|--------------------------------------|------------------------------|--------------------------|----------------------------|-----------------------------------------------------------------------|-------------------------------------------------------------------------|------------------------------------|
| methanol and<br>water extractions    |                              |                          |                            |                                                                       | extract 301-591<br>µg / mL                                              |                                    |
| lyophilized                          | 885 mg GAE /<br>100 g DW     | 1467 mg RuE<br>/100 g DW | 180 mM TE / 100 g          | IC <sub>50</sub> - Acarbose<br>20 µg / mL,<br>extract 2630<br>µg / mL | IC <sub>50</sub> - Acarbose<br>2060 µg / mL,<br>extract 1030 µg /<br>mL | IC <sub>50</sub> - 9360 µg /<br>mL |
| dehydrated at 105<br>°C              | 345-426 mg GAE<br>/ 100 g FW |                          | 11-12<br>mM TE / 100 g FW  |                                                                       |                                                                         |                                    |
| blueberry water-<br>based extraction | 80-140 mg GAE /<br>100 g FW  |                          | 70-80 %<br>DPPH inhibition | 50-90                                                                 | 55-80                                                                   |                                    |

<sup>1</sup> % inhibition, unless indicated, <sup>2</sup> - mg GAE / 100 mL of juice.

## References

- da Costa, J. S.; da Cruz, E. d. N. S.; Setzer, W. N.; da Silva, J. K. d. R.; Maia, J. G. S.; Figueiredo, P. L. B., Essentials Oils from Brazilian *Eugenia* and *Syzygium* Species and Their Biological Activities. *Biomolecules* **2020**, *10* (8), 1155.
- Santos, D. N.; de Souza, L. L.; de Oliveira, C. A. F.; Silva, E. R.; de Oliveira, A. L., Arginase inhibition, antibacterial and antioxidant activities of Pitanga seed (*Eugenia uniflora* L.) extracts from sustainable technologies of high pressure extraction. *Food bioscience* **2015**, *12*, 93-99.
- Oliveira, A. L.; Destandau, E.; Fougère, L.; Lafosse, M., Isolation by pressurised fluid extraction (PFE) and identification using CPC and HPLC/ESI/MS of phenolic compounds from Brazilian cherry seeds (*Eugenia uniflora* L.). *Food Chem.* **2014**, *145*, 522-529.
- Vinholes, J.; Vizzotto, M., Synergisms in alpha-glucosidase inhibition and antioxidant activity of camellia sinensis l. kuntze and eugenia uniflora l. ethanolic extracts. *Pharmacognosy Res.* **2017**, *9* (1), 101.
- Vinholes, J.; Lemos, G.; Lia Barbieri, R.; Franzon, R.; Vizzotto, M., In vitro assessment of the antihyperglycemic and antioxidant properties of araçá, butiá and Pitanga. *Food Biosci* **19**: 92–100. 2017.
- Vinholes, J.; Reis, S. F.; Lemos, G.; Barbieri, R. L.; de Freitas, V.; Franzon, R. C.; Vizzotto, M., Effect of in vitro digestion on the functional properties of *Psidium cattleianum* Sabine (araçá), *Butia odorata* (Barb. Rodr.) Noblick (butiá) and *Eugenia uniflora* L.(pitanga) fruit extracts. *Food Funct.* **2018**, *9* (12), 6380-6390.
- Siebert, D. A.; de Mello, F.; Alberton, M. D.; Vitali, L.; Micke, G. A., Determination of acetylcholinesterase and  $\alpha$ -glucosidase inhibition by electrophoretically-mediated microanalysis and phenolic profile by HPLC-ESI-MS/MS of fruit juices from Brazilian Myrtaceae *Plinia cauliflora* (Mart.) Kausel and *Eugenia uniflora* L. *Nat. Prod. Res.* **2020**, *34* (18), 2683-2688.
- Correia, R. T.; Borges, K. C.; Medeiros, M. F.; Genovese, M. I., Bioactive compounds and phenolic-linked functionality of powdered tropical fruit residues. *Food Sci. Technol. Int.* **2012**, *18* (6), 539-547.
- Monteiro, J. R. B.; Ardisson, J. S.; Athaydes, B. R.; Gonçalves, R. d. C. R.; Rodrigues, R. P.; Kuster, R. M.; Kitagawa, R. R., Anti-*Helicobacter pylori* and Anti-inflammatory Properties of *Eugenia uniflora* L. *Brazilian Archives of Biology and Technology* **2019**, *62*.

10. Senthil Kumar, K.; Gokila Vani, M.; Wang, C.-S.; Chen, C.-C.; Chen, Y.-C.; Lu, L.-P.; Huang, C.-H.; Lai, C.-S.; Wang, S.-Y., Geranium and lemon essential oils and their active compounds downregulate angiotensin-converting enzyme 2 (ACE2), a SARS-CoV-2 spike receptor-binding domain, in epithelial cells. *Plants* **2020**, *9* (6), 770.
11. Raspo, M. A.; Vignola, M. B.; Andreatta, A. E.; Juliani, H. R., Antioxidant and antimicrobial activities of citrus essential oils from Argentina and the United States. *Food Bioscience* **2020**, *36*, 100651.
12. Goldenberg, L.; Yaniv, Y.; Porat, R.; Carmi, N., Mandarin fruit quality: a review. *J. Sci. Food Agric.* **2018**, *98* (1), 18-26.
13. Sicari, V.; Pellicanò, T. M.; Giuffrè, A. M.; Zappia, C.; Capocasale, M., Bioactive compounds and antioxidant activity of citrus juices produced from varieties cultivated in Calabria. *Journal of Food Measurement and Characterization* **2016**, *10* (4), 773-780.
14. Gironés-Vilaplana, A.; Moreno, D.; García-Viguera, C., Phytochemistry and biological activity of Spanish citrus fruits. *Food Funct* **5**: 764–772. 2014.
15. Hussein, S.; Kaluf, A.; Ahmed, Y.; Ahmed, B.; Iyad, A., DETERMINATION OF INHIBITION ACTIVITY OF  $\alpha$ -AMYLASE ENZYME, ANTIOXIDANT ACTIVITY, ANTIBACTERIAL Activity AND PHENOLIC COMPOUNDS BY USING SOME MEDICAL PLANTS. *The Iraqi Journal of Agricultural Science* **2020**, *51* (1), 411-421.
16. Tejpal, S.; Wemyss, A. M.; Bastie, C. C.; Klein-Seetharaman, J., Lemon Extract Reduces Angiotensin Converting Enzyme (ACE) Expression and Activity and Increases Insulin Sensitivity and Lipolysis in Mouse Adipocytes. *Nutrients* **2020**, *12* (8), 2348.
17. Lu, S.-Y.; Chu, Y.-L.; Sridhar, K.; Tsai, P.-J., Effect of ultrasound, high-pressure processing, and enzymatic hydrolysis on carbohydrate hydrolyzing enzymes and antioxidant activity of lemon (*Citrus limon*) flavedo. *LWT* **2021**, *138*, 110511.
18. Alu'datt, M. H.; Rababah, T.; Alhamad, M. N.; Al-Mahasneh, M. A.; Ereifej, K.; Al-Karaki, G.; Al-Duais, M.; Andrade, J. E.; Tranchant, C. C.; Kubow, S.; Ghozlan, K. A., Profiles of free and bound phenolics extracted from Citrus fruits and their roles in biological systems: content, and antioxidant, anti-diabetic and anti-hypertensive properties. *Food Funct.* **2017**, *8* (9), 3187-3197.
19. Oboh, G.; Olasehinde, T. A.; Ademosun, A. O., Inhibition of enzymes linked to type-2 diabetes and hypertension by essential oils from peels of orange and lemon. *Int. J. Food Sci. Prop.* **2017**, *20* (sup1), S586-S594.
20. Fabroni, S.; Ballistreri, G.; Amenta, M.; Romeo, F. V.; Rapisarda, P., Screening of the anthocyanin profile and in vitro pancreatic lipase inhibition by anthocyanin-containing extracts of fruits, vegetables, legumes and cereals. *J. Sci. Food Agric.* **2016**, *96* (14), 4713-4723.
21. Spínola, V.; Pinto, J.; Castilho, P. C., Identification and quantification of phenolic compounds of selected fruits from Madeira Island by HPLC-DAD-ESI-MSn and screening for their antioxidant activity. *Food Chem.* **2015**, *173*, 14-30.
22. Flores, I. R.; Vásquez-Murrieta, M. S.; Franco-Hernández, M. O.; Márquez-Herrera, C. E.; Ponce-Mendoza, A.; del Socorro López-Cortéz, M., Bioactive compounds in tomato (*Solanum lycopersicum*) variety saladette and their relationship with soil mineral content. *Food Chem.* **2021**, *344*, 128608.
23. Tan, S.; Ke, Z.; Chai, D.; Miao, Y.; Luo, K.; Li, W., Lycopene, polyphenols and antioxidant activities of three characteristic tomato cultivars subjected to two drying methods. *Food Chem.* **2021**, *338*, 128062.



24. Marcolongo, P.; Gamberucci, A.; Tamasi, G.; Pardini, A.; Bonechi, C.; Rossi, C.; Giunti, R.; Barone, V.; Borghini, A.; Fiorenzani, P., Chemical Characterisation and Antihypertensive Effects of Locular Gel and Serum of *Lycopersicum esculentum* L. var. "Camone" Tomato in Spontaneously Hypertensive Rats. *Molecules* **2020**, *25* (16), 3758.
25. Aguiar, J.; Gonçalves, J. L.; Alves, V. L.; Câmara, J. S., Chemical Fingerprint of Free Polyphenols and Antioxidant Activity in Dietary Fruits and Vegetables Using a Non-Targeted Approach Based on QuEChERS Ultrasound-Assisted Extraction Combined with UHPLC-PDA. *Antioxidants* **2020**, *9* (4), 305.
26. Błaszczak, W.; Jeż, M.; Szwengiel, A., Polyphenols and inhibitory effects of crude and purified extracts from tomato varieties on the formation of advanced glycation end products and the activity of angiotensin-converting and acetylcholinesterase enzymes. *Food Chem.* **2020**, *314*, 126181.
27. Bot, F.; Anese, M.; Hungerford, G.; Lemos, M., Effect of high frequency ultrasounds on lycopene and total phenolic concentration, antioxidant properties and  $\alpha$ -glucosidase inhibitory activity of tomato juice. *Italian Journal of Food Science* **2017**, *29* (3), 424-433.
28. Belović, M. M.; Gironés-Vilaplana, A.; Moreno, D. A.; Milovanović, I. L.; Novaković, A. R.; Karaman, M. A.; Ilić, N. M., Tomato (*Solanum Lycopersicum* L.) Processing Main Product (Juice) and By-Product (Pomace) Bioactivity Potential Measured as Antioxidant Activity and Angiotensin-Converting Enzyme Inhibition. *J. Food Process. Preserv.* **2016**, *40* (6), 1229-1237.
29. Sricharoen, P.; Techawongstein, S.; Chanthai, S., Determination of lipophilic and hydrophilic antioxidant activities in the crude extracts of ten varieties of tomatoes. *Asia-Pacific Journal of Science and Technology* **2015**, *20* (1), 66-74.
30. Biswas, D.; Uddin, M. M.; Dizdarevic, L. L.; Jørgensen, A.; Duttaroy, A. K., Inhibition of angiotensin-converting enzyme by aqueous extract of tomato. *Eur. J. Nutr.* **2014**, *53* (8), 1699-1706.
31. Zhong, H.; Zhao, M.; Tang, J.; Deng, L.; Feng, F., Probiotics-fermented blueberry juices as potential antidiabetic product: antioxidant, antimicrobial and antidiabetic potentials. *J. Sci. Food Agric.*
32. Yousefi, M.; Shadnough, M.; Khorshidian, N.; Mortazavian, A. M., Insights to potential antihypertensive activity of berry fruits. *Phytother. Res.* **2021**, *35* (2), 846-863.
33. Tian, S.; Li, X.; Zang, S.; Jin, Y.; Zhang, Z.; Yu, Y.,  $\alpha$ -Amylase and tyrosinase inhibitory activities, phenolic contents, and antioxidant capacities of wild and cultivated blueberries. *J. Food Process. Preserv.* **2021**, *45* (1), e15087.
34. Barut, B.; Barut, E. N.; Engin, S.; Özel, A.; Sezen, F. S., Investigation of the Antioxidant,  $\alpha$ -Glucosidase Inhibitory, Anti-inflammatory, and DNA Protective Properties of *Vaccinium arctostaphylos* L. *Turkish Journal of Pharmaceutical Sciences* **2019**, *16* (2), 175.
35. Spínola, V.; Pinto, J.; Castilho, P. C., Hypoglycemic, anti-glycation and antioxidant in vitro properties of two *Vaccinium* species from Macaronesia: A relation to their phenolic composition. *J. Funct. Foods* **2018**, *40*, 595-605.
36. Carvalho, M. J.; Gouveia, C. S.; Vieira, A. C.; Pereira, A. C.; Carvalho, M. Â.; Marques, J. C., Nutritional and phytochemical composition of *Vaccinium padifolium* Sm wild berries and radical scavenging activity. *J. Food Sci.* **2017**, *82* (11), 2554-2561.
37. Sarkar, D.; Agustinah, W.; Woods, F.; Coneva, E.; Vinson, E.; Shetty, K., In vitro screening and evaluation of phenolic antioxidant-linked anti-hyperglycemic functions of rabbit-eye blueberry (*Vaccinium ashei*) cultivars. *Journal of Berry Research* **2017**, *7* (3), 163-177.

Figure S1: Correlation dendograms obtained for the selected extracts.

A. Pitanga seeds

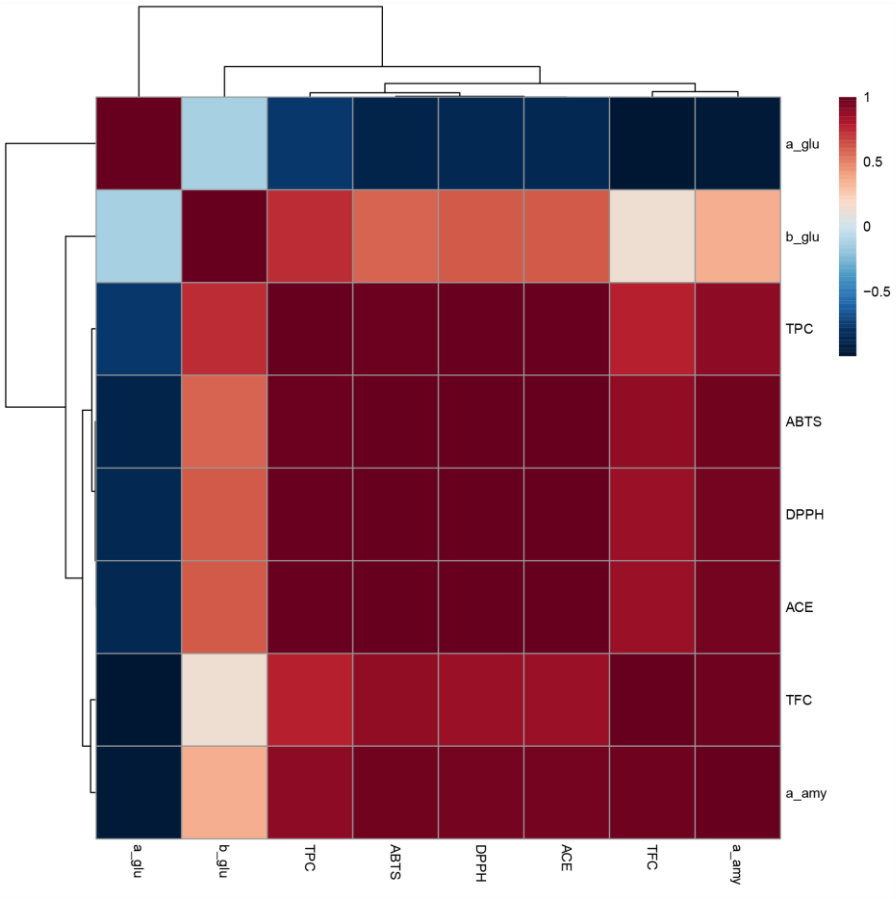

B. Pitanga pulp

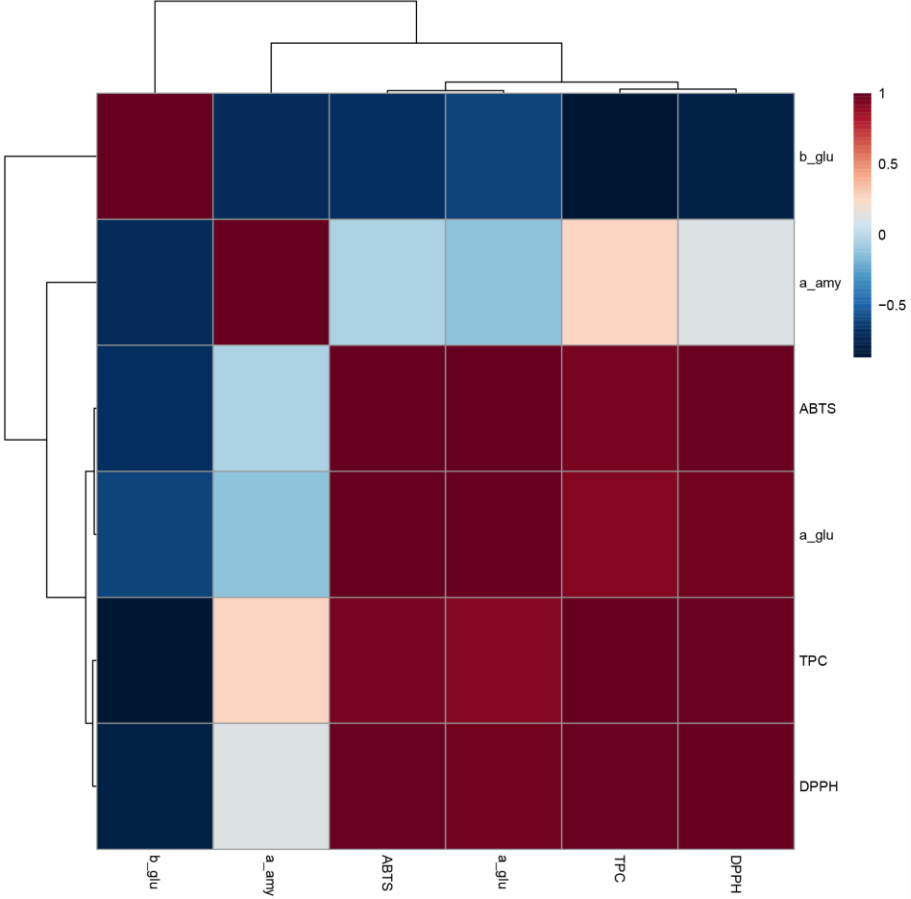

C. Lemon peel

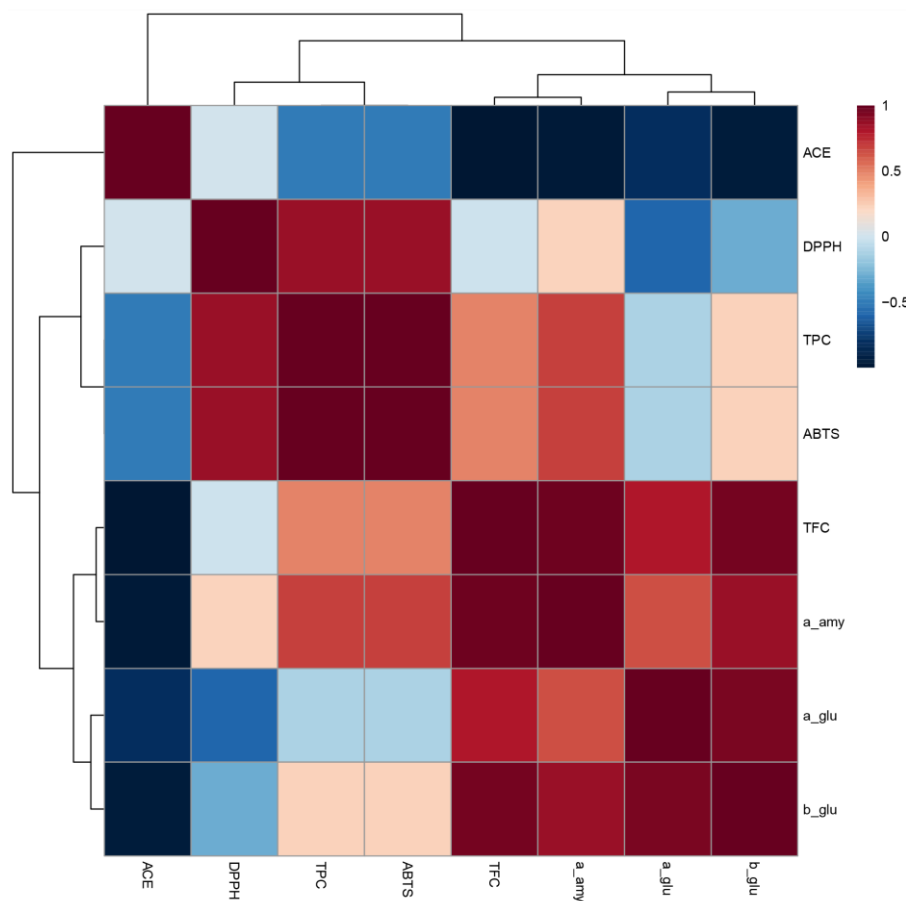

D. Lemon juice

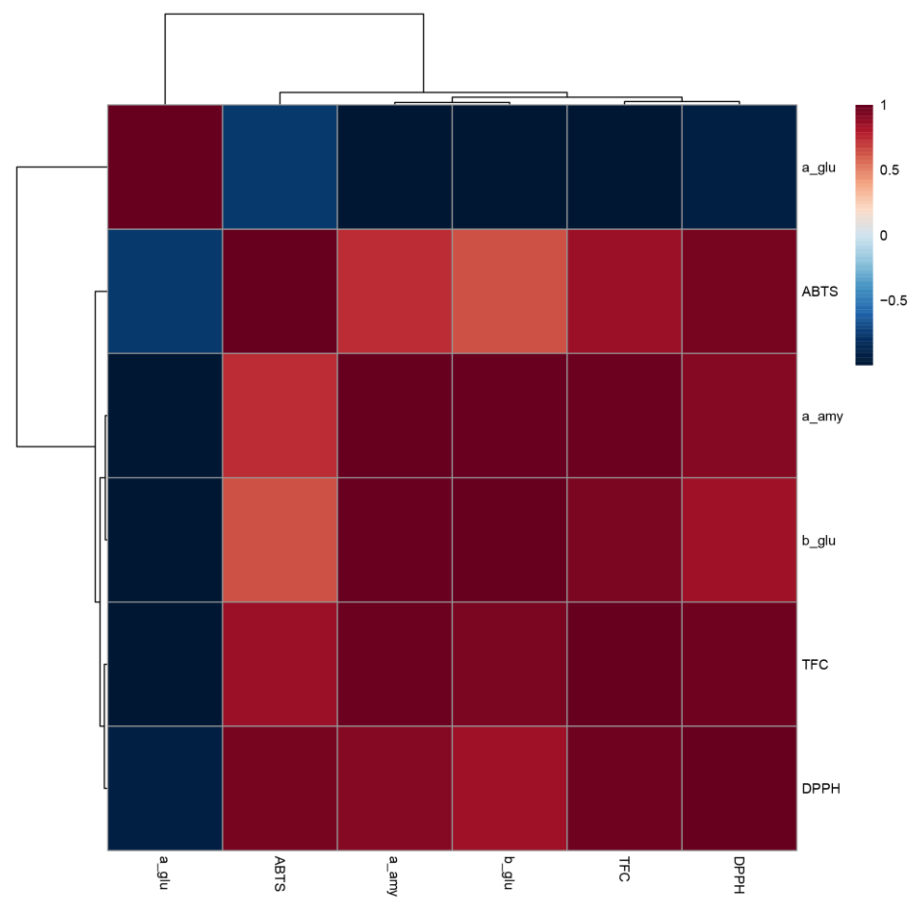

E. tangerine peel

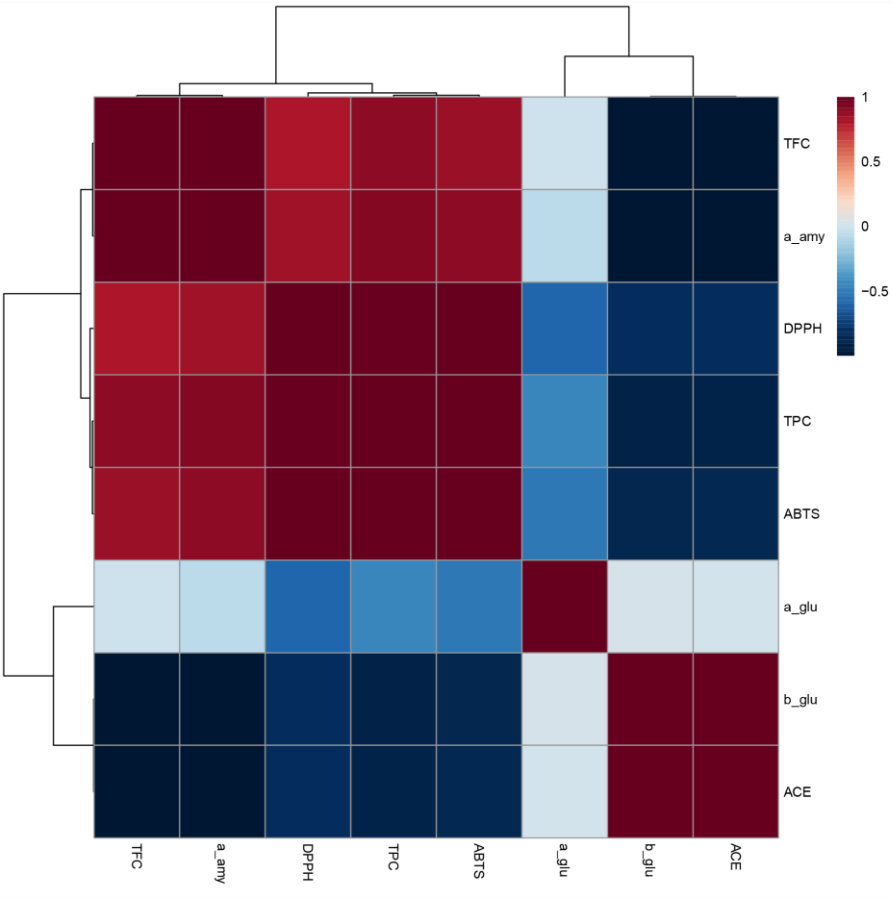

F. tangerine juice

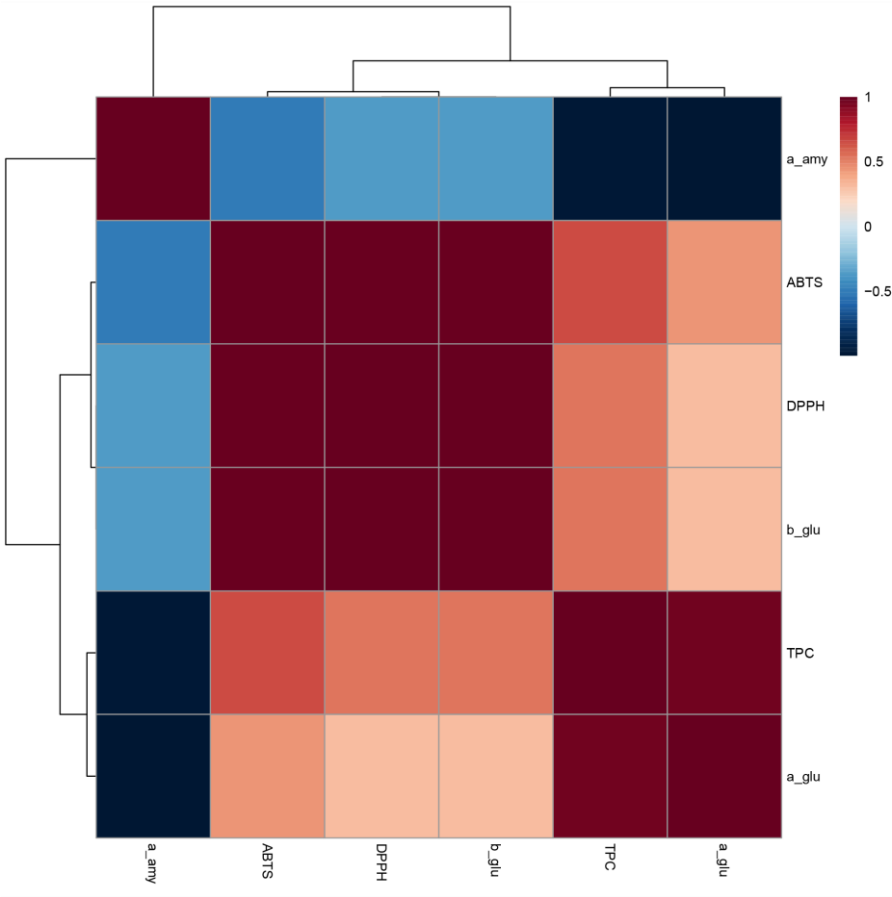

E. uva-da-serra

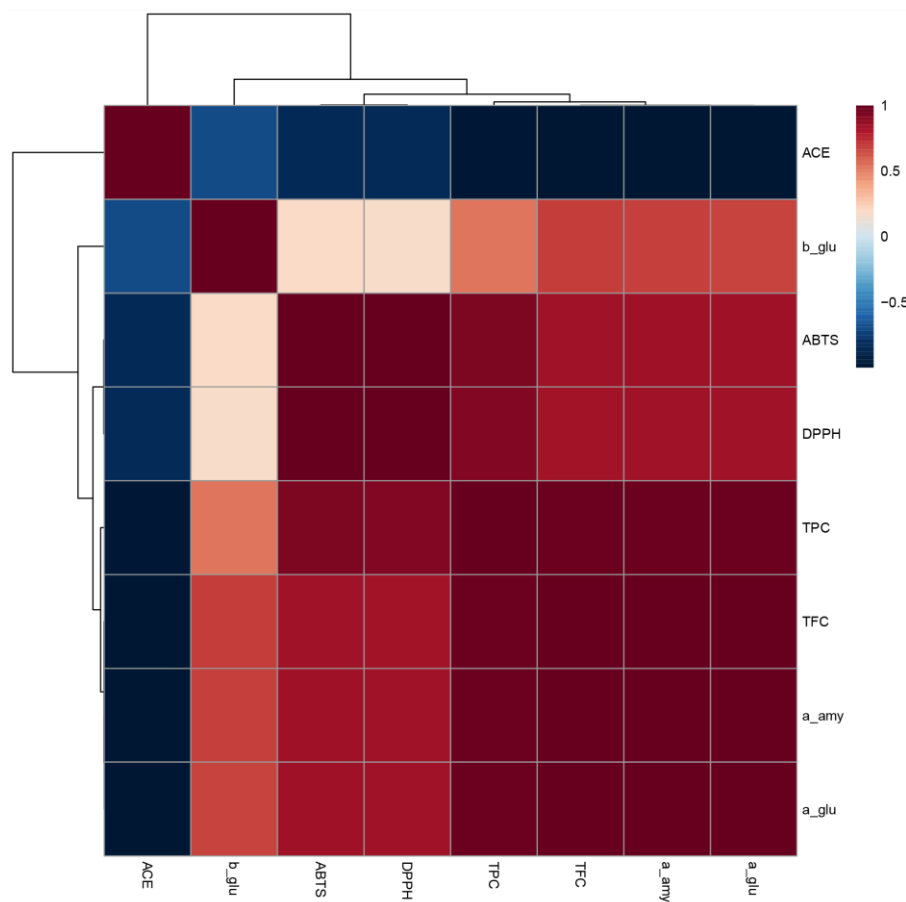

F. tomato

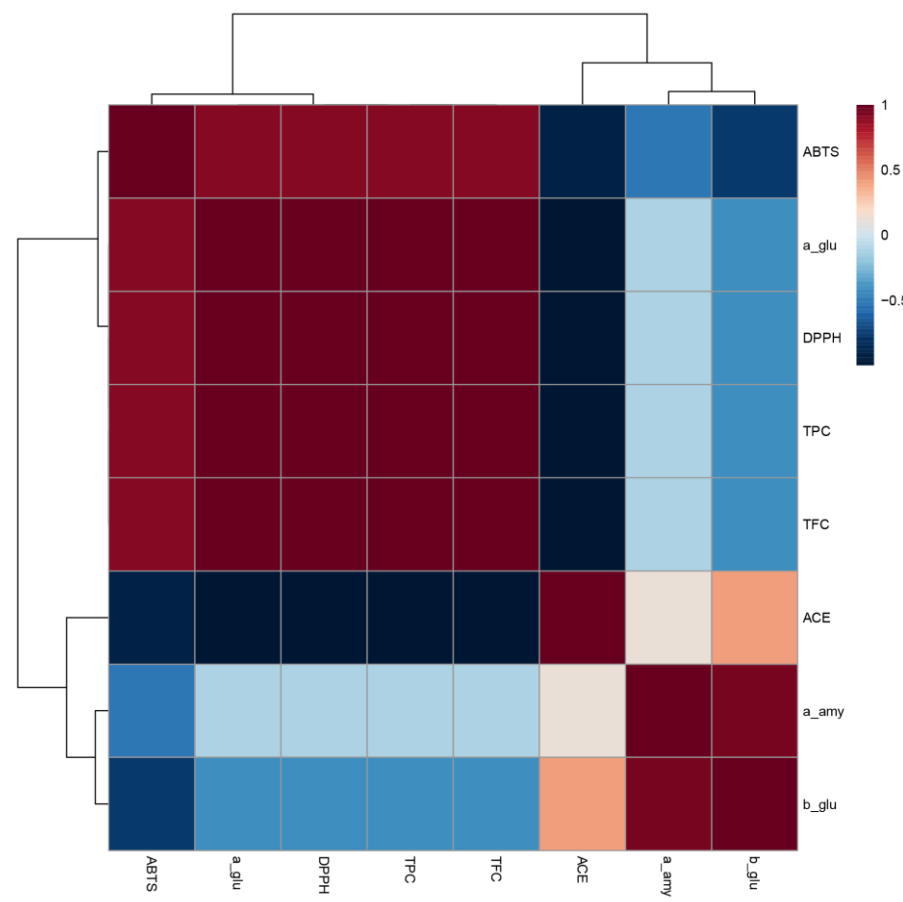

Supplement: s1 [file s1]
